# Supplementary material for: Structural diversity of Zn(ii) based coordination polymers constructed from a flexible carboxylate linker and pyridyl co-linkers: fluorescence sensing of nitroaromatics
Source: Royal Society of Chemistry journal article supplement (doi:10.1039/c7nj02651j), 2017-01-01
Supplement: c7nj02651j1.pdf [file c7nj02651j1.pdf]

## Structural Diversity of Zn(II) Based Coordination Polymers Constructed from a Flexible Carboxylate Linker and Pyridyl Co-linkers : Fluorescence Sensing of Nitro-aromatics

Anoop K. Gupta, Kapil Tomar and Parimal K. Bharadwaj\*

Department of Chemistry, Indian Institute of Technology Kanpur, Kanpur 208016, India.

Email: pkb@iitk.ac.in

### Synthesis of the ligand (H<sub>3</sub>L)

This synthesis of ligand H<sub>3</sub>L (**scheme 1**) and pyridyl-based co-ligand dpd was reported in our previous work<sup>1</sup> and was characterized by elemental analysis, <sup>1</sup>H and <sup>13</sup>C NMR spectroscopy, and ESI-MS analysis.

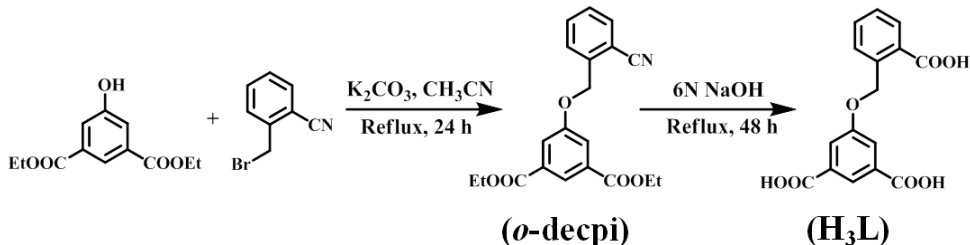

**Scheme S1.** The synthetic scheme for preparation of (H<sub>3</sub>L).

### Synthesis of diethyl 5-(2-cyanophenethyl)isophthalate (o-decpi)

5-Hydroxyisophthalic acid diethyl ester<sup>2</sup> (2 g, 8.4 mmol) and dry K<sub>2</sub>CO<sub>3</sub> (1.7 g, 12.6 mmol) were mixed in a round-bottom flask under an inert atmosphere. Dry acetonitrile (10 mL) was added to it, and the mixture was stirred for 30 min at 80 °C. The mixture was treated with 2-(bromomethyl)benzonitrile (1.65 g, 8.40 mmol), and the resulting solution was refluxed for 24 h. At the end of this period, it was allowed to cool to room temperature and poured in ice-cold

water (75 mL) to obtain a white solid that was collected by filtration and dried in air. Yield: 2.8g (86%).  $^1\text{H-NMR}$  ( $\text{CDCl}_3$ , 400 MHz): 8.3251(s, 1H), 7.8436 (s, 2H), 7.7297 - 7.6372 (m, 3H), 7.4774 - 7.4547 (m, 1H), 5.318 (s, 2H), 4.3946 (q, J = 7.12 Hz, 4H), 1.4002 (t, J = 5.84 Hz, 6H);  $^{13}\text{C NMR}$  ( $\text{DMSO-d}_6$ , 125 MHz):165, 158, 139, 133, 132, 128, 124, 120, 117, 111,77, 68, 61, 14; IR (cm-1, KBr pellet): 3087 (m), 2983 (m), 2229 (m), 1713 (s), 1598(m), 1451(m), 1334(s), 1236 (s), 1128(m), 1044;(s), 957(s), 889(m), 768(s); ESI-MS: m/z  $[\text{M}+\text{H}]^+$  354.13 (100%) ,  $[\text{M}+\text{H}_2\text{O}]^+$  371.16 (60%). Elemental analysis: Calcd. for  $\text{C}_{20}\text{H}_{19}\text{NO}_5$  (353.37): C, 67.97; H, 5.42; N, 3.96 % Found: C, 67.39; H, 5.51; N, 3.75 %.

### **Synthesis of 5-(2-Carboxybenzyloxy)isophthalic acid ( $\text{H}_3\text{L}$ ).**

Compound *o*-dmcbi obtained as above (2 g, 5.17 mmol) was hydrolyzed by refluxing it with 6(N) NaOH solution (20 mL) for 24 h. After cooling to 5 °C, the resulting solution was acidified with 6(N) HCl solution to obtain a white precipitate. It was collected by filtration, washed thoroughly with water, and dried in air. Yield: 1.3 g (80%). It has been characterized by  $^1\text{H NMR}$  ( $\text{DMSO-d}_6$ , 400 MHz), Mass Spectrometry, IR spectroscopy, elemental analysis.  $^1\text{H-NMR}$  ( $\text{DMSO-d}_6$ , 400 MHz): 8.0537 (s, 1H), 7.9117 - 7.8920 (m, 1H), 7.6685 - 7.6380 (m, 3H), 7.5694 (t, J = 7.76 Hz, 1H), 7.4205 (t, J = 7.28 Hz, 1H), 5.5069 (s, 2H);  $^{13}\text{C NMR}$  ( $\text{DMSO-d}_6$ , 125 MHz): 169, 167, 159, 138, 131, 128, 123, 119, 100, 69, 40; IR (cm-1, KBr pellet): 3403(broad), 3201(broad), 2625 (m), 1711(m), 1594(m), 1472(m), 1395(m), 1271(m), 1152(m), 1044(m), 953(m), 871(m), 759(s); ESI-MS: m/z  $[\text{M}]^+$  316.06 (20%) ,  $[\text{M}-\text{H}]^+$  315.05(100%). Elemental analysis: Calcd. for  $\text{C}_{16}\text{H}_{12}\text{O}_7$  (316.26): C, 60.76; H, 3.82% Found: C, 59.97; H, 3.75%.

## **Materials and measurements.**

### **Materials**

Reagent-grade 5-hydroxyisophthalic acid, 2 (bromomethyl)benzonitrile, 4-aminopyridine, sodium hypochlorite solution, N,N-diethylformamide (DEF), 1,3-di(4-pyridyl)propane (1,3-dpp), 1,2-di(4-pyridyl)ethane (1,2-dpe), 1,2-di(4-pyridyl)ethylene (dpe) and  $\text{Zn}(\text{NO}_3)_2 \cdot 6\text{H}_2\text{O}$  were acquired from Aldrich and used as received. All solvents, HCl, NaOH and  $\text{K}_2\text{CO}_3$  were procured from S. D. Fine Chemicals, India. The solvents were purified prior to use following standard methods.

### **Physical Measurement**

Infrared spectra were recorded on Perkin-Elmer Model 1320 spectrometer (KBr disk, 400–4000  $\text{cm}^{-1}$ ).  $^1\text{H}$ -NMR and  $^{13}\text{C}$ -NMR spectra were recorded on a JEOL-ECX 500 FT (500 MHz and 125 MHz respectively) instrument in  $\text{CDCl}_3$  and  $\text{DMSO}-d_6$  with  $\text{Me}_4\text{Si}$  as the internal standard. ESI-mass spectra were recorded on a WATERS Q-TOF Premier mass spectrometer. Thermogravimetric analyses (TGA) were recorded on Mettler Toledo Star System (heating rate of  $5^\circ\text{C}/\text{min}$ ). Microanalyses for the compounds were obtained using a CE-440 elemental analyzer (Exeter Analytical Inc.). The solid-state emission spectra were recorded using a Jobin Yvon Horiba Fluorolog-3 spectrofluorimeter at room temperature (RT). The UV-vis spectra were recorded on a Shimadzu 2450 UV-vis spectrophotometer at RT. The steady-state emission spectra of the complexes dispersed in solvents were obtained using a Agilent Cary eclipse fluorescence spectrophotometer at RT. Powder X-ray diffraction ( $\text{Cu K}_\alpha$  radiation, scan rate  $3^\circ/\text{min}$ , 293 K) was performed on a Bruker D8 Advance Series 2 powder X-ray diffractometer.

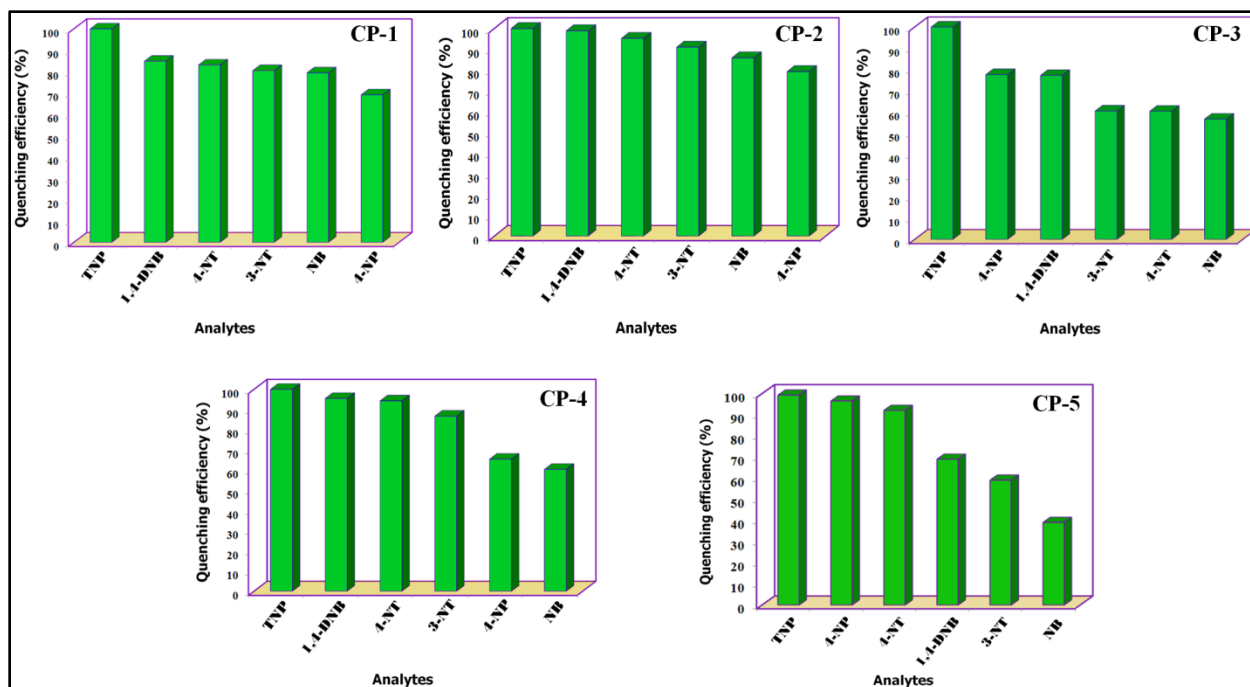

**Fig. S1** showing Quenching-efficiency plot (bar diagram) obtained for different nitro-aromatic analytes in **CPs 1-5** at room temperature.

### Elemental analysis and IR of CP 1-5

**CP-1:** Block shaped. colorless. Yield = 57%. Anal. Calcd for  $C_{28}H_{21}Zn_2N_2O_9$ : C, 50.93; H, 3.21; N, 4.24%. Found: C, 50.63; H, 3.37; N, 4.11%. IR ( $cm^{-1}$ ): 3485 (broad), 3063 (m), 1613 (s), 1578 (s), 1454 (m), 1407 (s), 1355 (s), 1260 (m), 1127 (m), 1098 (m), 1022 (s), 967 (m), 926 (m), 888 (m), 828 (s), 776 (s), 757 (s), 673 (m).

**CP-2:** Niddle shaped. Colorless. Yield = 51%. Anal. Calcd for  $C_{34}H_{29}ZnN_3O_8$ : C, 60.68; H, 4.34; N, 6.24%. Found: C, 60.17; H, 3.13; N, 6.41%. IR ( $cm^{-1}$ ): 3492 (broad), 3069 (m), 1618 (s), 1571 (s), 1504 (m), 1448 (m), 1399 (s), 1325 (m), 1261 (m), 1127 (m), 1043 (s), 926 (m), 822 (m), 798 (s), 780 (s), 750 (s), 686 (m).

**CP-3:** Block shaped. Orange color. Yield = 63%. Anal. Calcd for  $C_{62}H_{50}Zn_2N_{12}O_{17}$ : C, 54.51; H, 3.69; N, 12.31%. Found: C, 54.93; H, 3.81; N, 12.07%. IR ( $cm^{-1}$ ): 3483 (broad), 3100 (m), 3067 (m), 1664 (s), 1615 (s), 1587 (s), 1494 (m), 1456 (m), 1420 (s), 1380 (s), 1355 (s), 1260 (m), 1223 (m), 1154 (m), 1128 (m), 1057 (m), 1022 (s), 995 (m), 927 (m), 880 (m), 847 (s), 776 (s), 758 (s), 673 (m).

**CP-4:** Block shaped. Pale yellow color. Yield = 47%. Anal. Calcd for  $C_{29}H_{24}ZnN_2O_7$ : C, 60.27; H, 4.19; N, 4.85%. Found: C, 60.81; H, 4.36; N, 4.49%. IR ( $cm^{-1}$ ): 3407 (broad), 3063 (m), 2933 (m), 1706 (s), 1621 (s), 1585 (s), 1554 (s), 1434 (s), 1382 (s), 1266 (m), 1193 (m), 1128 (m), 1070 (m), 1033 (s), 917 (m), 816 (m), 781 (m), 765 (s), 681 (m).

**CP-5:** Block shaped. Colorless. Yield = 39%. Anal. Calcd for  $C_{76}H_{68}Zn_5N_2O_{38}$ : C, 46.94; H, 3.52; N, 1.44%. Found: C, 45.31; H, 3.93; N, 1.32%. IR ( $cm^{-1}$ ): 3432 (broad), 2930 (m), 1617 (s), 1589 (s), 1569 (s), 1501(m), 1446 (s), 1402(s), 1359 (m), 1259 (m), 1128 (m), 1044 (s), 899 (m), 823 (m), 779 (s), 729(m), 687 (m).

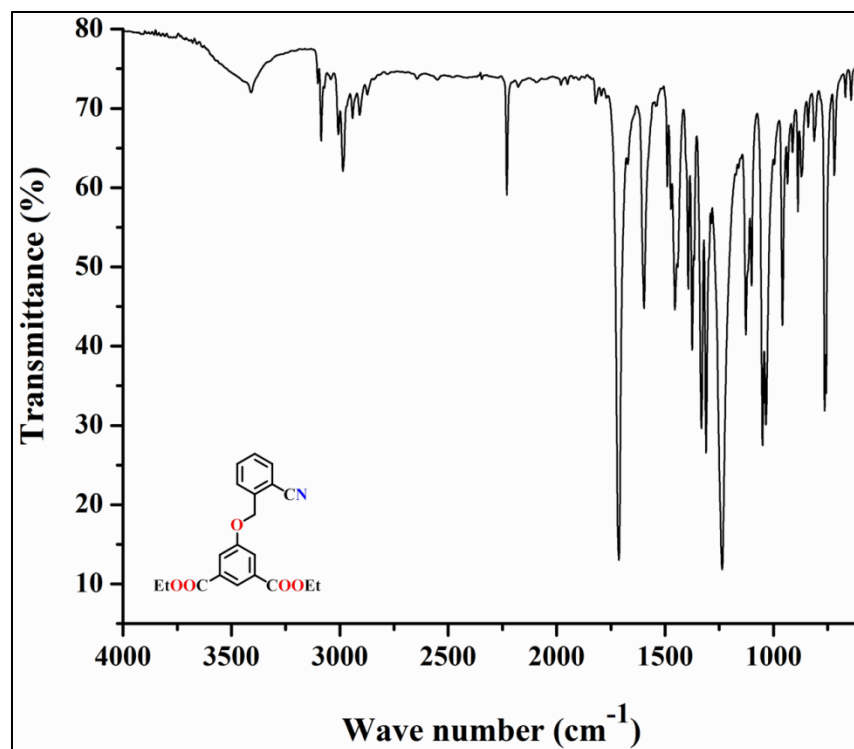

Fig. S2 IR Spectrum of *o*-decpi.

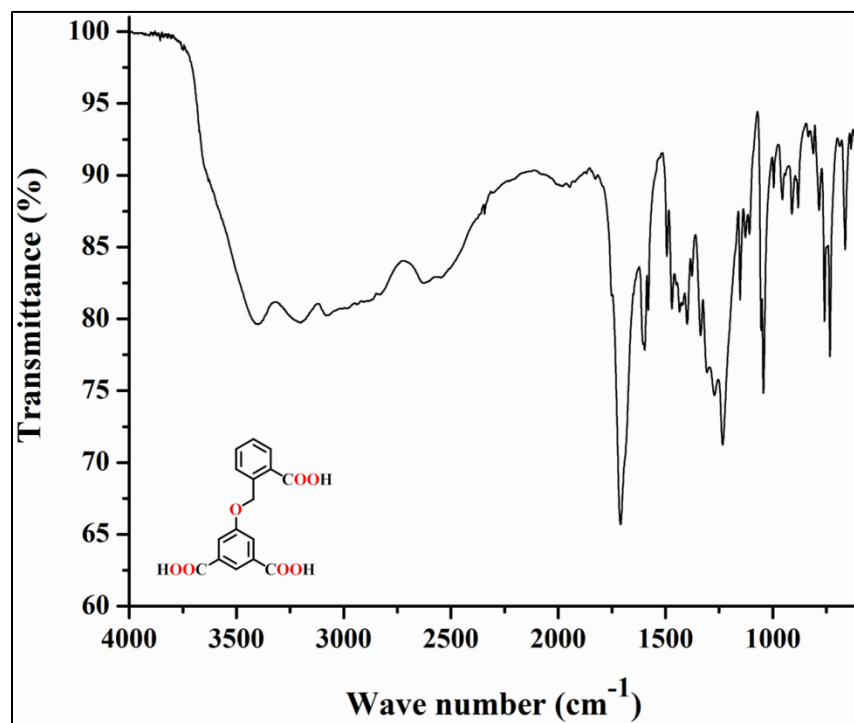

Fig. S3 IR Spectrum of H<sub>3</sub>L.

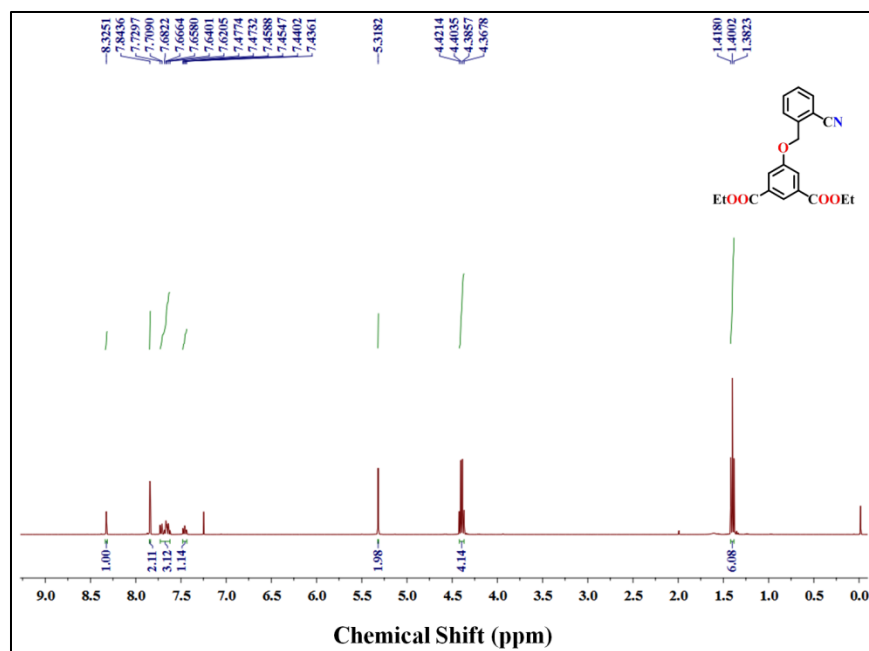

Fig. S4  $^1\text{H}$  NMR spectrum of *o*-decpi.

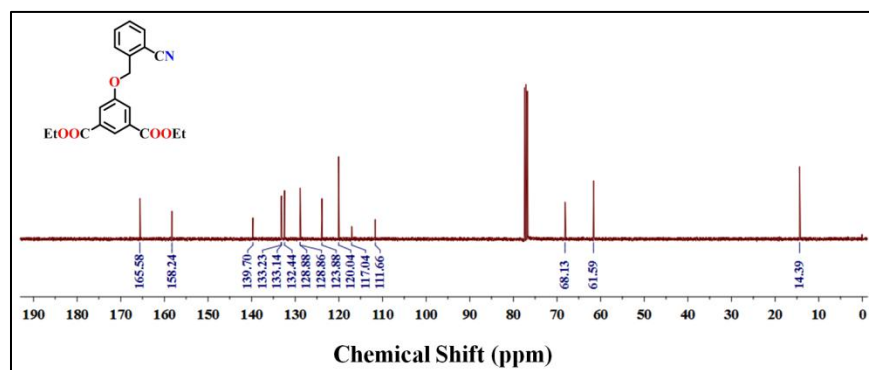

Fig. S5  $^{13}\text{C}$  NMR spectrum of *o*-decpi.

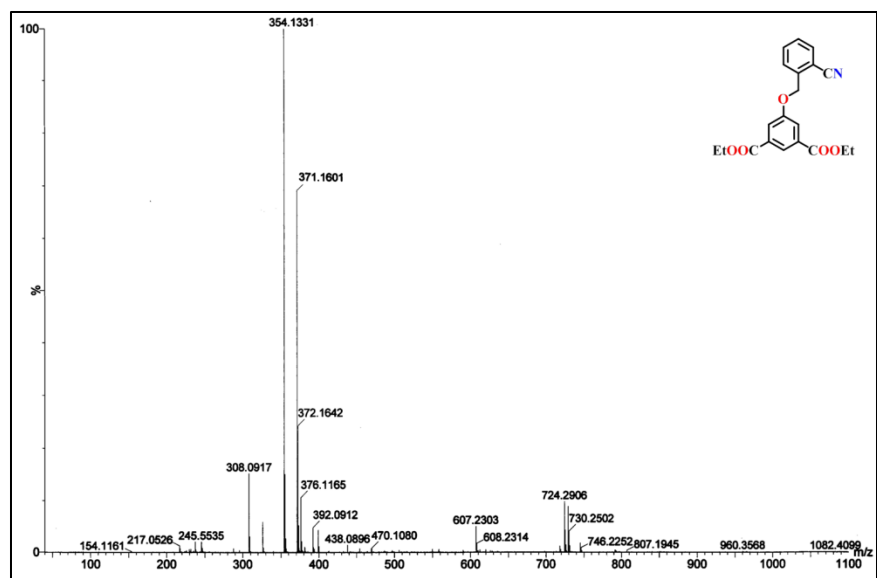

Fig. S6 ESI-MS spectrum of *o*-decpi.

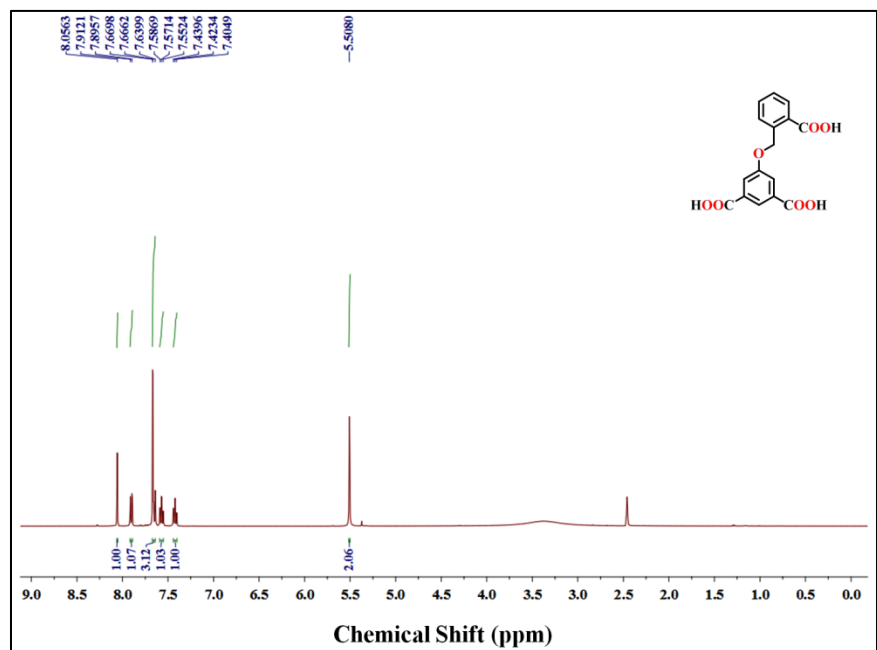

Fig. S7 <sup>1</sup>H NMR spectrum of H<sub>3</sub>L.



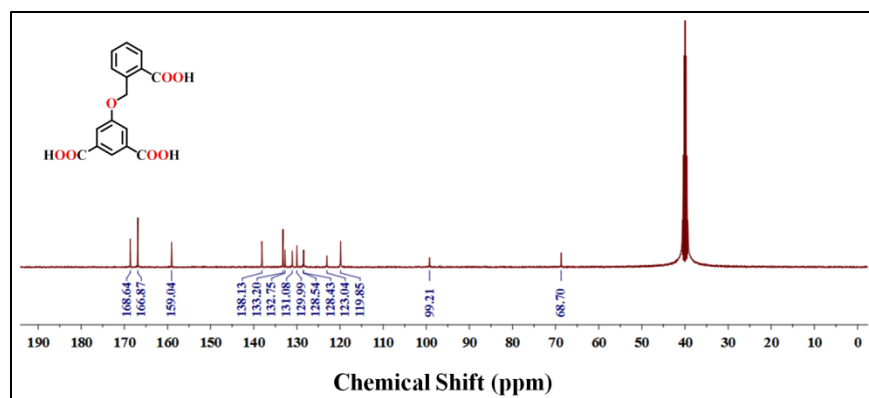

Fig. S8 <sup>13</sup>C NMR spectrum of H<sub>3</sub>L.

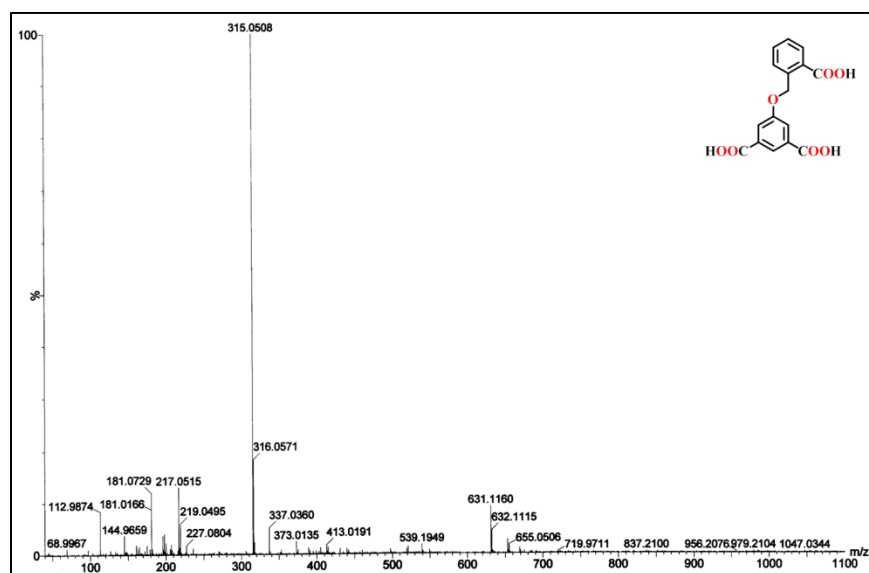

Fig. S9 ESI-MS spectrum of H<sub>3</sub>L.

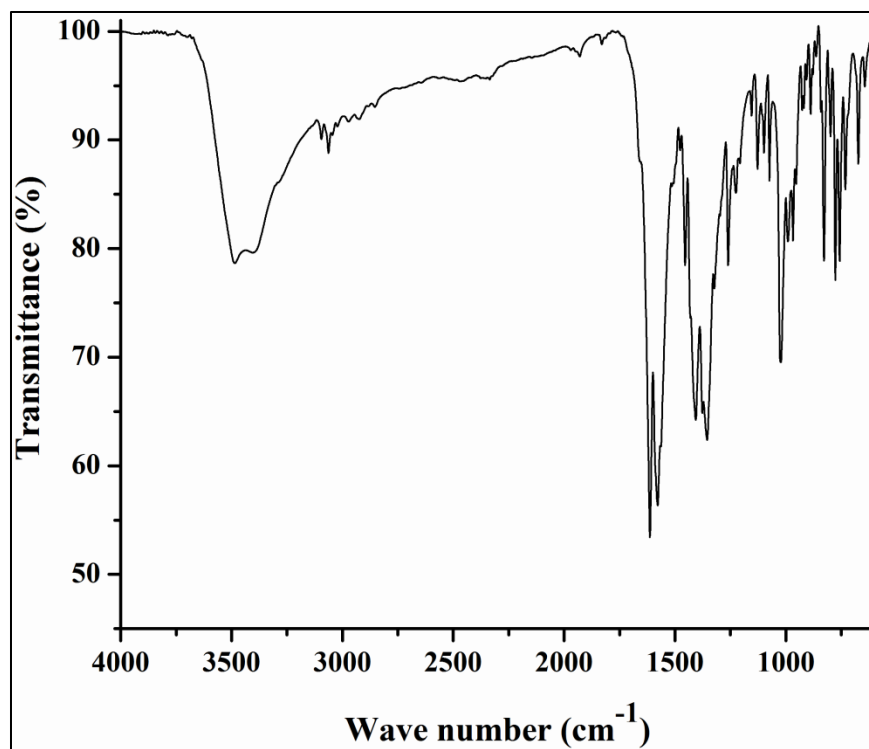

**Fig. S10** IR spectrum of CP 1.

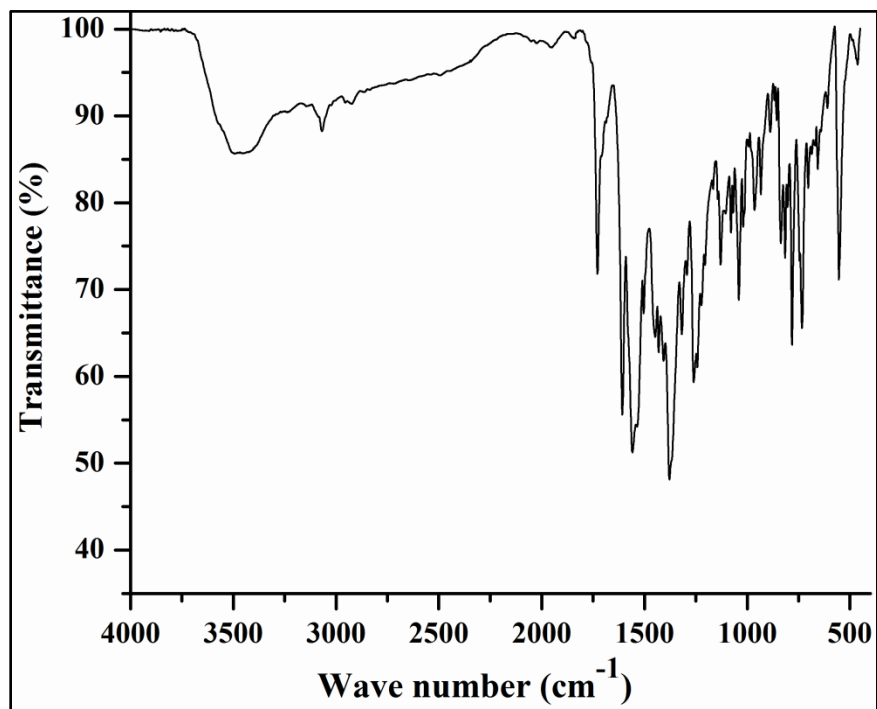

**Fig. S11** IR spectrum of CP 2.

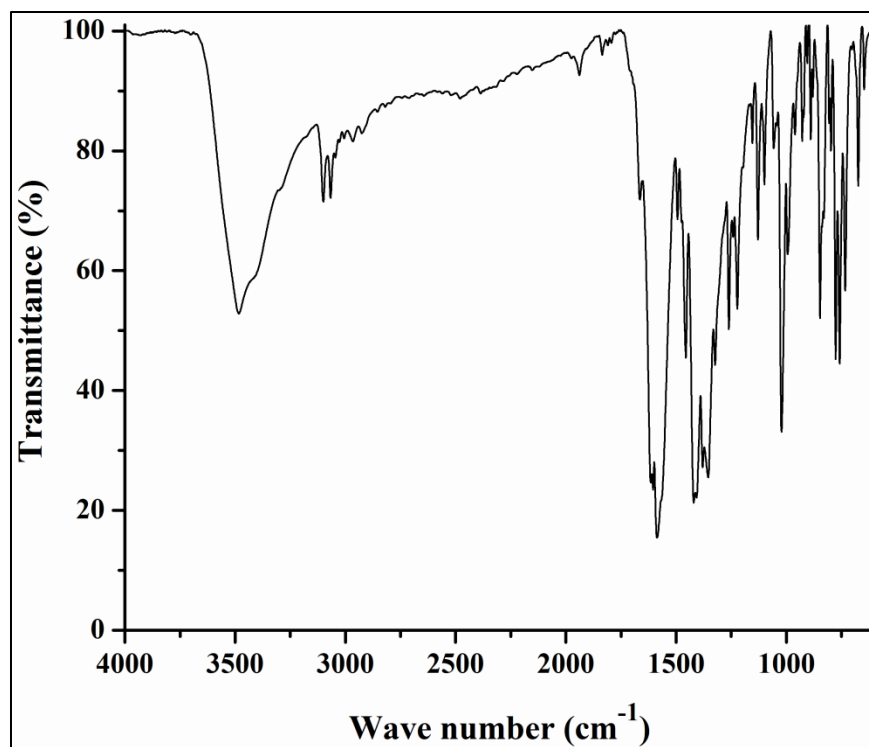

**Fig. S12** IR spectrum of CP 3.

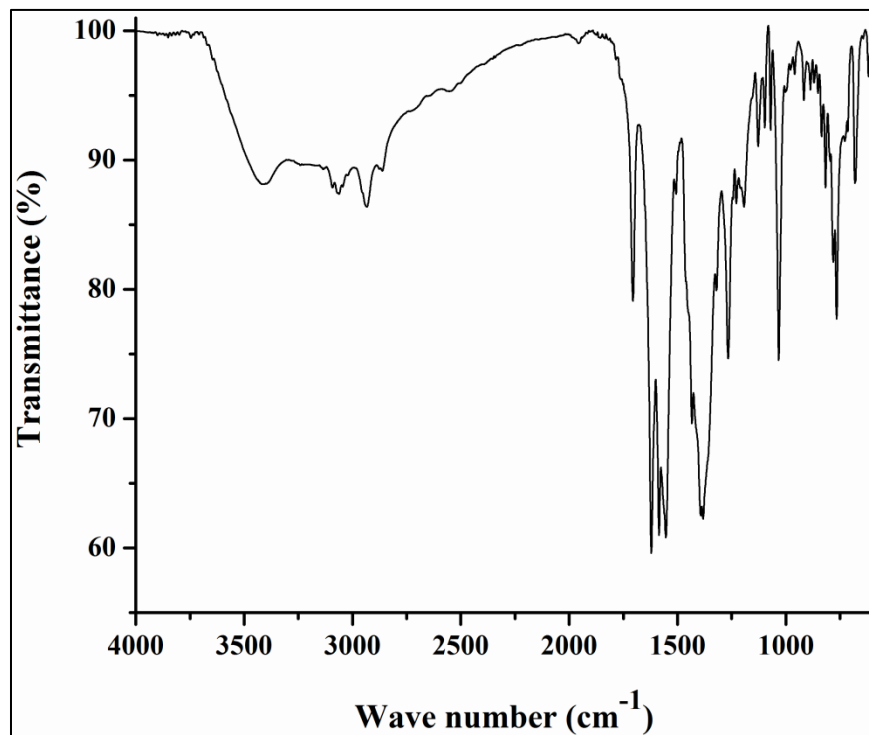

**Fig. S13** IR spectrum of CP 4.

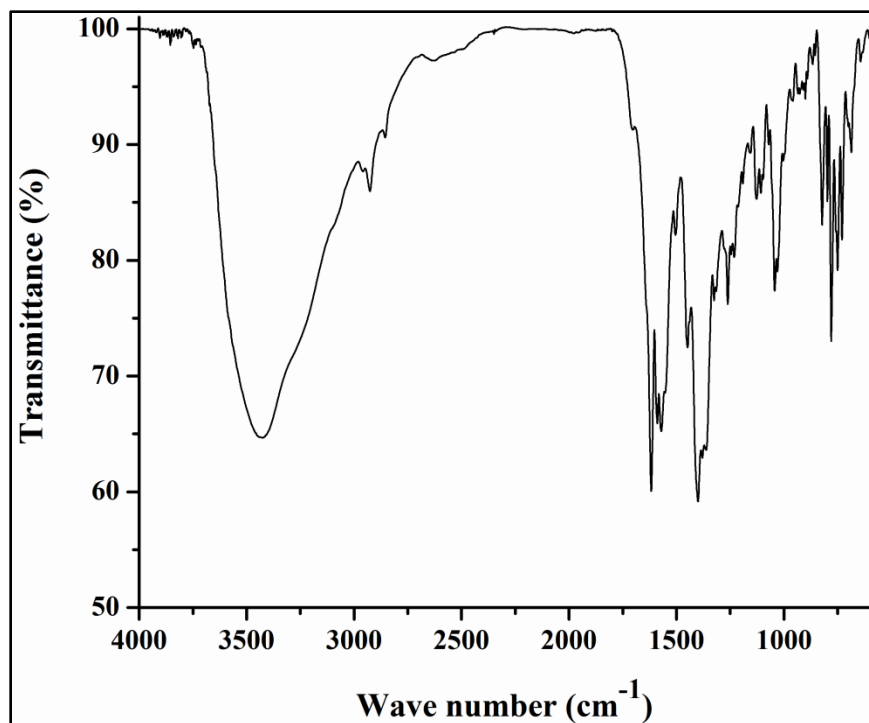

**Fig. S14** IR spectrum of CP 5.

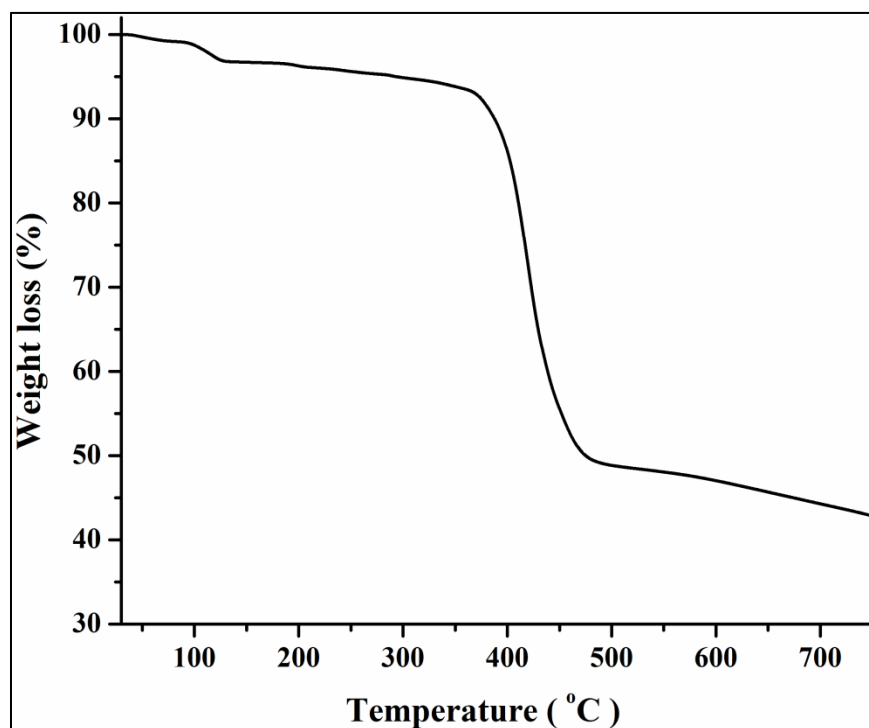

**Fig. S15** TGA of CP 1.

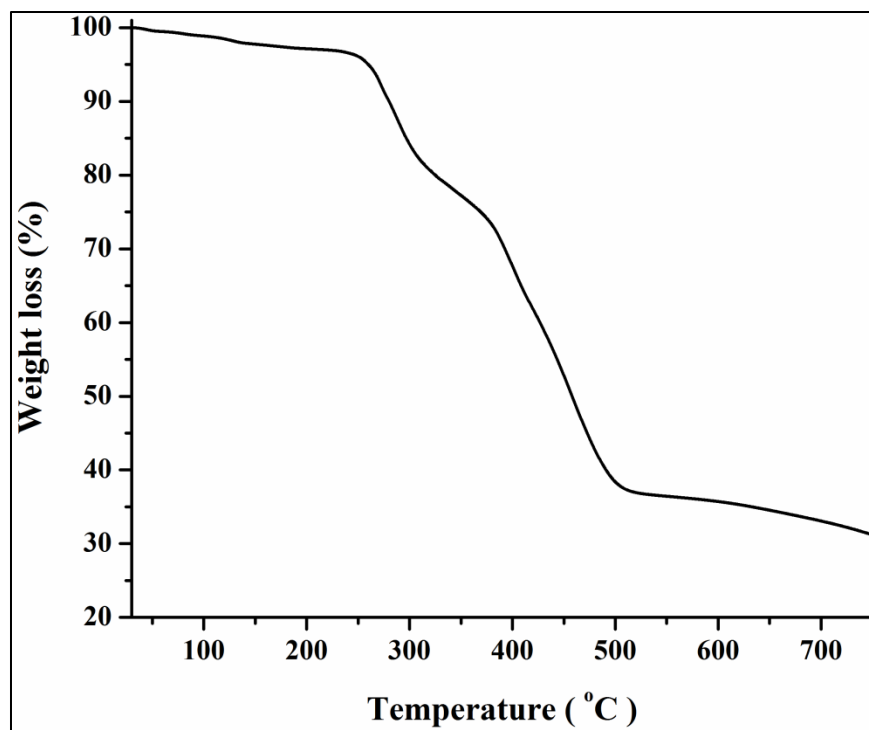

**Fig. S16** TGA of CP 2.

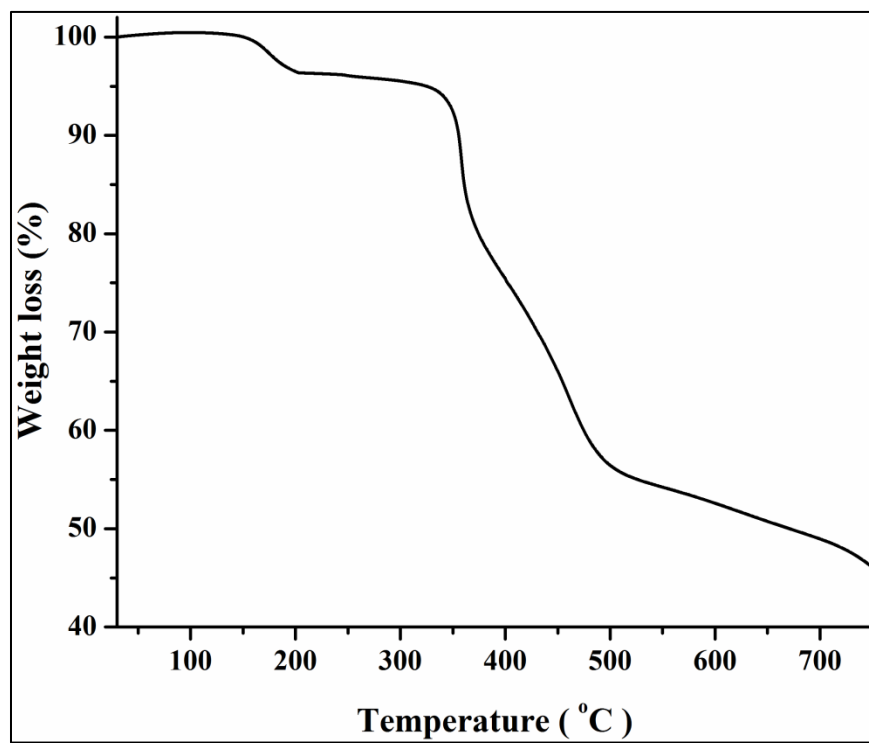

**Fig. S17** TGA of CP 3.

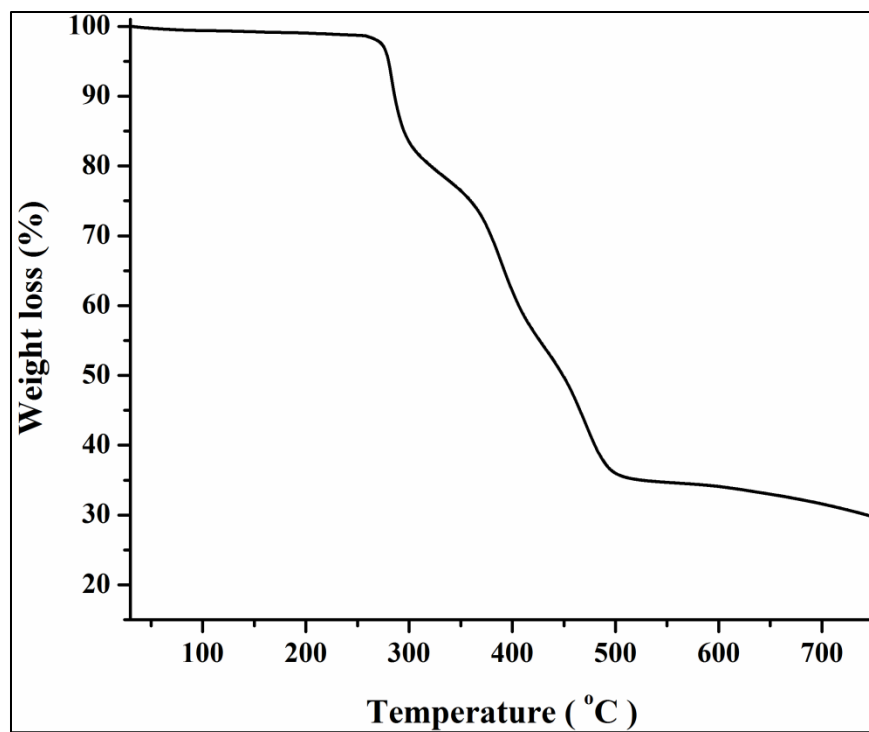

**Fig. S18** TGA of CP 4.

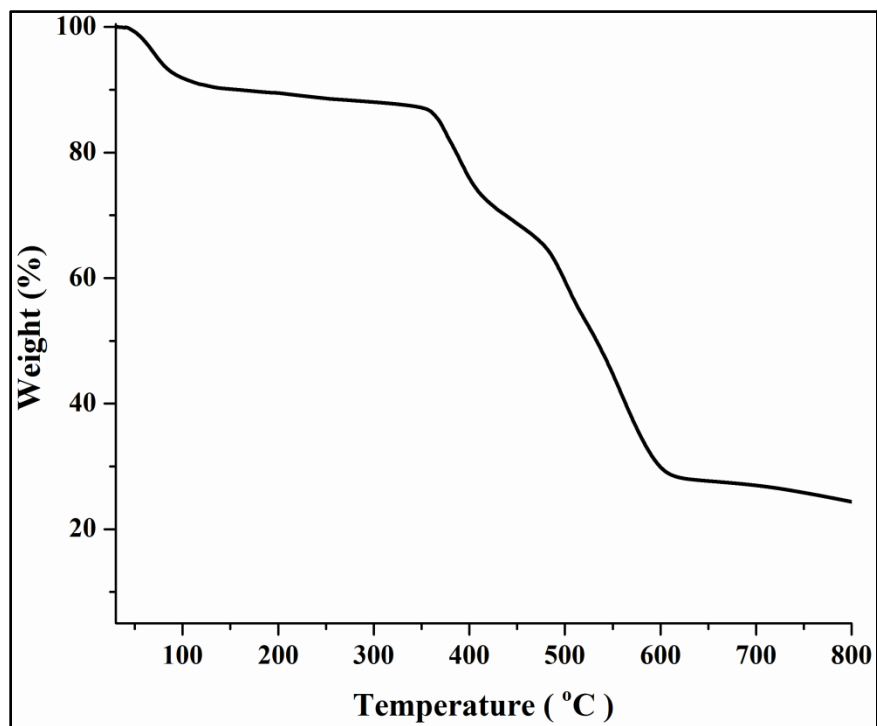

**Fig. S19** TGA of CP 5.

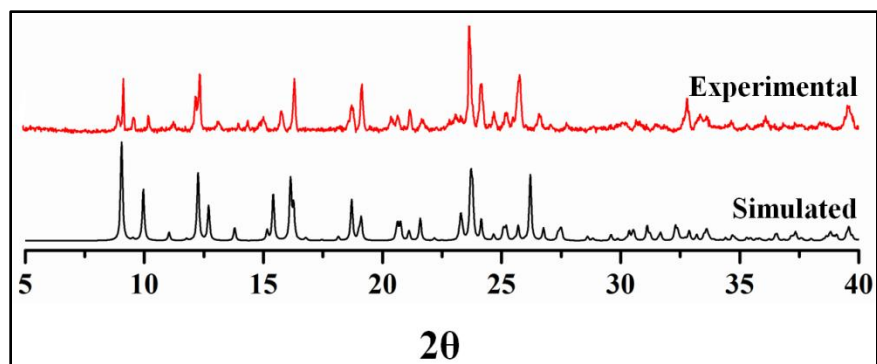

**Fig. S20** PXR D of CP 1.

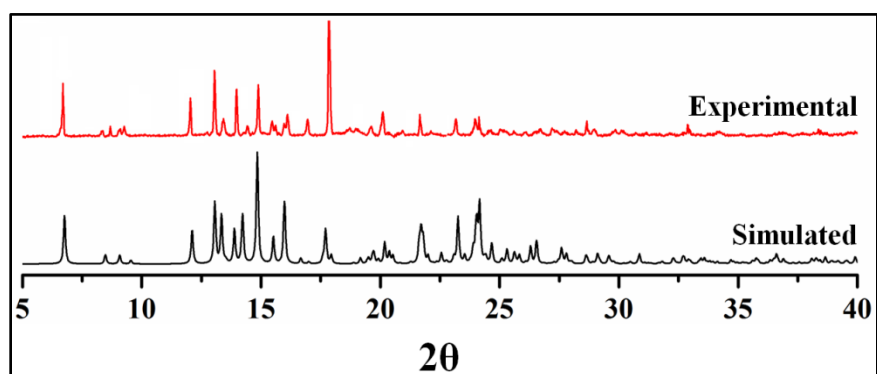

**Fig. S21** PXR D of CP 2.

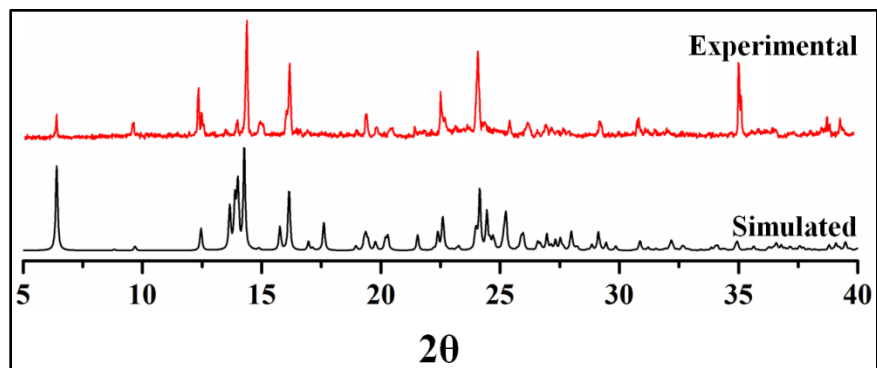

**Fig. S22** PXR D of CP 3.

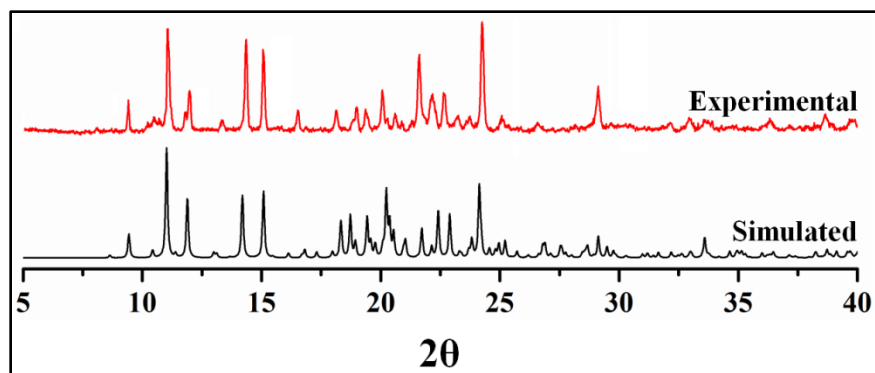

**Fig. S23** PXR D of CP 4.

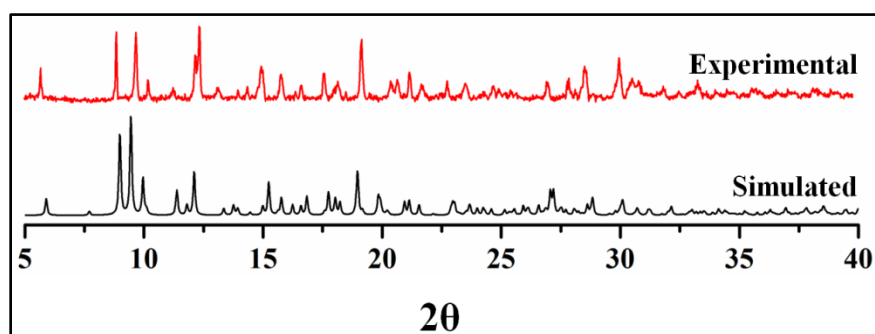

**Fig. S24** PXR D of CP 5.

**Table S1.** Crystal and Structure Refinement Data for CP 1–5.

| Parameters        | CP-1                         | CP-2                       | CP-3                               |
|-------------------|------------------------------|----------------------------|------------------------------------|
| Empirical formula | $C_{28} H_{21} Zn_2 N_2 O_9$ | $C_{34} H_{29} Zn N_3 O_8$ | $C_{62} H_{44} Zn_2 N_{12} O_{17}$ |
| Formula wt.       | 660.25                       | 672.99                     | 1359.87                            |
| Crystal system    | monoclinic                   | monoclinic                 | monoclinic                         |
| Space group       | $P2_1/n$                     | $P2_1/c$                   | $P2_1/c$                           |



|                                        |            |              |            |
|----------------------------------------|------------|--------------|------------|
| $a$ , Å                                | 11.612(5)  | 13.8409(6)   | 14.513(5)  |
| $b$ , Å                                | 18.565(5)  | 14.6035(6)   | 14.200(5)  |
| $c$ , Å                                | 11.650(5)  | 15.7700(7)   | 14.873(5)  |
| $\alpha$ (deg)                         | 90         | 90           | 90         |
| $\beta$ (deg)                          | 99.506(5)  | 109.2860(10) | 108.193(5) |
| $\gamma$ (deg)                         | 90         | 90           | 90         |
| $U$ , Å <sup>3</sup>                   | 2477.0(16) | 3008.6(2)    | 2911.9(17) |
| $Z$                                    | 4          | 4            | 2          |
| $\rho_{\text{calc}}$ g/cm <sup>3</sup> | 1.770      | 1.486        | 1.551      |
| $\mu$ , mm <sup>-1</sup>               | 2.000      | 0.876        | 0.910      |
| Temperature (°K)                       | 100        | 100          | 100        |
| $\theta_{\text{max}}$                  | 25.488     | 28.331       | 25.496     |
| $F(000)$                               | 1340       | 1392         | 1392       |
| Refl. collected                        | 20234      | 30020        | 23636      |
| Independent refl.                      | 4599       | 7495         | 5407       |
| GOOF                                   | 1.155      | 1.038        | 1.021      |

|                                         |                             |                             |                             |
|-----------------------------------------|-----------------------------|-----------------------------|-----------------------------|
| Final R indices<br>[ $I > 2\sigma(I)$ ] | R1 = 0.0372<br>wR2 = 0.0923 | R1 = 0.0827<br>wR2 = 0.1869 | R1 = 0.0548<br>wR2 = 0.1146 |
| R indices<br>(all data)                 | R1 = 0.0587<br>wR2 = 0.1201 | R1 = 0.1429<br>wR2 = 0.2241 | R1 = 0.0852<br>wR2 = 0.1284 |

| Parameters                | CP-4                                                             | CP-5                                                                           |
|---------------------------|------------------------------------------------------------------|--------------------------------------------------------------------------------|
| Empirical formula         | C <sub>29</sub> H <sub>24</sub> Zn N <sub>2</sub> O <sub>7</sub> | C <sub>76</sub> H <sub>60</sub> Zn <sub>5</sub> N <sub>2</sub> O <sub>37</sub> |
| Formula wt.               | 577.89                                                           | 1920.21                                                                        |
| Crystal system            | monoclinic                                                       | triclinic                                                                      |
| Space group               | <i>P</i> 2 <sub>1</sub> / <i>n</i>                               | <i>P</i> -1                                                                    |
| <i>a</i> , Å              | 11.800(5)                                                        | 10.2889(7)                                                                     |
| <i>b</i> , Å              | 15.524(5)                                                        | 11.9148(8)                                                                     |
| <i>c</i> , Å              | 13.684(5)                                                        | 15.1141(11)                                                                    |
| $\alpha$ (deg)            | 90                                                               | 91.109(2)                                                                      |
| $\beta$ (deg)             | 95.835(5)                                                        | 96.935(2)                                                                      |
| $\gamma$ (deg)            | 90                                                               | 105.482(2)                                                                     |
| <i>U</i> , Å <sup>3</sup> | 2493.7(16)                                                       | 1770.0(2)                                                                      |

|                                         |                              |                             |
|-----------------------------------------|------------------------------|-----------------------------|
| Z                                       | 4                            | 1                           |
| $\rho_{\text{calc}} \text{ g/cm}^3$     | 1.539                        | 1.801                       |
| $\mu, \text{ mm}^{-1}$                  | 1.039                        | 1.777                       |
| Temperature (°K)                        | 100                          | 100                         |
| $\theta_{\text{max}}$                   | 25.500                       | 28.361                      |
| F(000)                                  | 1192                         | 976                         |
| Refl. collected                         | 20282                        | 27341                       |
| Independent refl.                       | 4636                         | 8828                        |
| GOOF                                    | 1.088                        | 1.026                       |
| Final R indices<br>[I > 2 $\sigma$ (I)] | R1 = 0.0444<br>wR2 = 0.09354 | R1 = 0.0441<br>wR2 = 0.0990 |
| R indices<br>(all data)                 | R1 = 0.0731<br>wR2 = 0.1167  | R1 = 0.0670<br>wR2 = 0.1085 |

**Table S2 Selected Bond distances (Å) and angles (°)**

| <b>{[Zn<sub>2</sub>(L)(μ-OH)(dpe)(H<sub>2</sub>O)]<sub>n</sub> (1)}</b> |            |             |            |            |            |
|-------------------------------------------------------------------------|------------|-------------|------------|------------|------------|
| <b>Bond Distances (Å)</b>                                               |            |             |            |            |            |
| O8—Zn1                                                                  | 1.914(3)   | O8—Zn2      | 1.971(3)   | O3—Zn2     | 2.009(3)   |
| O2W—Zn2                                                                 | 2.197(3)   | O6—Zn1      | 1.981(3)   | O1—Zn1     | 1.969(3)   |
| O5—Zn2                                                                  | 2.091(3)   | N1A—Zn1     | 2.078(3)   | N2A—Zn2    | 2.090(3)   |
| <b>Bond Angles (°)</b>                                                  |            |             |            |            |            |
| Zn1-O8-Zn2                                                              | 115.50(14) | O8-Zn1-N1A  | 103.85(12) | O8-Zn1-O6  | 111.86(12) |
| O8-Zn1-O1                                                               | 118.19(11) | O6-Zn1-N1A  | 100.17(12) | O1-Zn1-N1A | 107.64(12) |
| O1-Zn1-O6                                                               | 112.94(12) | N2A-Zn2-O2W | 105.80(12) | N2A-Zn2-O5 | 100.25(12) |
| O8-Zn2-N2A                                                              | 93.78(12)  | O8-Zn2-O3   | 167.75(11) | O8-Zn2-O2W | 83.57(12)  |
| O8-Zn2-O5                                                               | 97.46(12)  | O3-Zn2-N2A  | 97.19(12)  | O3-Zn2-O2W | 88.19(12)  |
| O3-Zn2-O5                                                               | 85.97(11)  | O5-Zn2-O2W  | 153.82(11) |            |            |

| <b>{[Zn(L)(1,2-dpe)<sub>1.5</sub>]}·H<sub>2</sub>O<sub>n</sub> (2)}</b> |            |           |            |           |           |
|-------------------------------------------------------------------------|------------|-----------|------------|-----------|-----------|
| <b>Bond Distances (Å)</b>                                               |            |           |            |           |           |
| Zn1—O4                                                                  | 2.096(4)   | Zn1—O1    | 1.992(4)   | Zn1—O3    | 2.218(4)  |
| Zn1—N2                                                                  | 2.067(4)   | Zn1—N1    | 2.062(4)   |           |           |
| <b>Bond Angles (°)</b>                                                  |            |           |            |           |           |
| O4-Zn1-O3                                                               | 60.97(14)  | O1-Zn1-O4 | 140.12(14) | O1-Zn1-O3 | 93.42(14) |
| O1-Zn1-N2                                                               | 97.81(19)  | O1-Zn1-N1 | 107.5(2)   | N2-Zn1-O4 | 94.80(19) |
| N2-Zn1-O3                                                               | 151.58(17) | N1-Zn1-O4 | 104.0(2)   | N1-Zn1-O3 | 92.94(16) |
| N1-Zn1-N2                                                               | 108.24(17) |           |            |           |           |

| <b>[[Zn(HL)(dpd)<sub>1.5</sub>]<sub>2</sub>·2(H<sub>2</sub>O)]<sub>n</sub> (3)</b> |            |             |            |             |            |
|------------------------------------------------------------------------------------|------------|-------------|------------|-------------|------------|
| <b>Bond Distances (Å)</b>                                                          |            |             |            |             |            |
| Zn1—O3A                                                                            | 2.002(3)   | Zn1—N2A     | 2.068(3)   | Zn1—O6A     | 2.427(4)   |
| Zn1—N3A                                                                            | 2.061(3)   | Zn1—O7A     | 2.017(3)   | N4A—N5A     | 1.195(5)   |
| <b>Bond Angles (°)</b>                                                             |            |             |            |             |            |
| O3A-Zn1-N2A                                                                        | 99.93(12)  | O3A-Zn1-O6A | 156.45(13) | O3A-Zn1-N3A | 101.20(12) |
| O3A-Zn1-O7A                                                                        | 104.50(13) | N2A-Zn1-O6A | 89.19(13)  | N3A-Zn1-N2A | 105.52(13) |
| N3A-Zn1-O6A                                                                        | 97.13(13)  | O7A-Zn1-N2A | 141.17(15) | O7A-Zn1-O6A | 57.73(14)  |
| O7A-Zn1-N3A                                                                        | 98.83(13)  |             |            |             |            |

| <b>[[Zn(HL)(1,3-dpp)]]<sub>n</sub> (4)</b> |            |           |            |           |            |
|--------------------------------------------|------------|-----------|------------|-----------|------------|
| <b>Bond Distances (Å)</b>                  |            |           |            |           |            |
| Zn1—O7                                     | 2.265(3)   | Zn1—O2    | 2.007(3)   | Zn1—O6    | 2.067(3)   |
| Zn1—N2                                     | 2.062(3)   | Zn1—N1    | 2.066(3)   |           |            |
| <b>Bond Angles (°)</b>                     |            |           |            |           |            |
| O2-Zn1-O7                                  | 132.80(10) | O2-Zn1-O6 | 105.42(11) | O2-Zn1-N2 | 103.32(11) |
| O2-Zn1-N1                                  | 94.83(11)  | O6-Zn1-O7 | 60.45(11)  | N2-Zn1-O7 | 86.45(11)  |
| N2-Zn1-O6                                  | 145.87(11) | N2-Zn1-N1 | 100.21(11) | N1-Zn1-O7 | 129.25(11) |
| N1-Zn1-O6                                  | 95.33(11)  |           |            |           |            |

| <b>[[Zn<sub>5</sub>(L)<sub>4</sub>(H<sub>2</sub>O)]·(H<sub>2</sub>O)<sub>8</sub>(1,2-dpe)]<sub>n</sub> (5)</b> |          |        |          |        |          |
|----------------------------------------------------------------------------------------------------------------|----------|--------|----------|--------|----------|
| <b>Bond Distances (Å)</b>                                                                                      |          |        |          |        |          |
| Zn2—O12                                                                                                        | 2.199(2) | Zn2—O1 | 2.015(2) | Zn2—O5 | 2.110(2) |
| Zn1—O12                                                                                                        | 2.088(2) | Zn1—O6 | 2.004(2) | Zn1—O3 | 1.995(2) |

|                        |            |             |            |             |            |
|------------------------|------------|-------------|------------|-------------|------------|
| Zn1—O2                 | 1.964(2)   | Zn1—O11     | 2.300(2)   | Zn3—O9      | 2.020(2)   |
| Zn3—O15                | 1.991(2)   | Zn3—O8      | 2.097(2)   | Zn3—O7      | 2.051(2)   |
| Zn3—O10                | 2.022(2)   | Zn3—Zn3     | 2.9684(7)  |             |            |
| <b>Bond Angles (°)</b> |            |             |            |             |            |
| O12-Zn2-O12            | 180.0      | O1-Zn2-O12  | 90.38(8)   | O1-Zn2-O1   | 180.0      |
| O1-Zn2-O5              | 95.50(9)   | O5-Zn2-O12  | 92.05(8)   | O5-Zn2-O5   | 180.00(10) |
| O12-Zn1-O11            | 59.60(8)   | O6-Zn1-O12  | 104.59(9)  | O6-Zn1-O11  | 92.44(9)   |
| O3-Zn1-O12             | 142.69(9)  | O3-Zn1-O6   | 104.95(9)  | O3-Zn1-O11  | 96.86(9)   |
| O2-Zn1-O12             | 101.96(9)  | O2-Zn1-O6   | 102.04(10) | O2-Zn1-O3   | 93.63(9)   |
| O2-Zn1-O11             | 159.30(9)  | O9-Zn3-Zn3  | 78.10(6)   | O9-Zn3-O8   | 88.00(9)   |
| O9-Zn3-O7              | 88.12(10)  | O9-Zn3-O10  | 158.76(9)  | O15-Zn3-Zn3 | 168.65(8)  |
| O15-Zn3-O9             | 103.12(10) | O15-Zn3-O8  | 98.73(10)  | O15-Zn3-O7  | 102.12(10) |
| O15-Zn3-O10            | 98.11(10)  | O8-Zn3-Zn3  | 69.97(6)   | O7-Zn3-Zn3  | 89.17(7)   |
| O7-Zn3-O8              | 159.13(9)  | O10-Zn3-Zn3 | 80.95(7)   | O10-Zn3-O8  | 88.13(10)  |
| O10-Zn3-O7             | 88.10(10)  | Zn1-O12-Zn2 | 105.31(9)  |             |            |

## References

1. A. K. Gupta, K. Tomar and P. K. Bharadwaj, *CrystEngComm*, 2017, **19**, 2253–2263.
2. K. Motesharei and D. C. Myles, *J. Am. Chem. Soc.*, 1998, **120**, 7328-7336.
